# Supplementary material
Source: HighWire-hosted journal article supplement (https://emj.bmj.com/content/emermed-2024-214407)
Supplement: inline-supplementary-material-2 [file inline-supplementary-material-2.pdf]

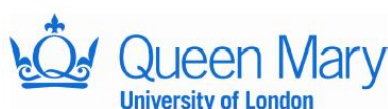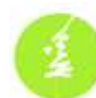

Asthma UK Centre  
for Applied Research

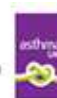

|                                                                                                                                                                                                                                                                                                                        |
|------------------------------------------------------------------------------------------------------------------------------------------------------------------------------------------------------------------------------------------------------------------------------------------------------------------------|
| <b>Topic: Introduction</b>                                                                                                                                                                                                                                                                                             |
| 1. Are you happy to continue with the interview?                                                                                                                                                                                                                                                                       |
| <b>Topic: Context, beliefs and behaviours</b>                                                                                                                                                                                                                                                                          |
| 1. Can you tell me about your experience of working with people with asthma, and in what context?                                                                                                                                                                                                                      |
| 2. What do you think brings people to the Emergency Department for their asthma?<br>Probe: non-clinical reasons (culture, deprivation, out of hours, challenges with accessing GP)<br>Probe: anxiety<br>Probe: escalation management – action plan?<br>Probe: UTC vs ED                                                |
| 3. What do you think are the attitudes of the patients you see to their asthma?<br>Probe: seriousness?<br>Probe: their sense of control?                                                                                                                                                                               |
| 4. What do you think their attitudes are to their asthma medications in particular?<br>Probe: reliever/preventor<br>Probe: necessity?<br>Probe: adherence                                                                                                                                                              |
| <b>Topic: Beliefs and behaviours on current asthma management</b>                                                                                                                                                                                                                                                      |
| 1. How confident do you feel with your asthma care?<br>Probe: educating<br>Probe: action plans?<br>Probe: technique? Optimise devices?                                                                                                                                                                                 |
| 2. What things do you consider/do when you make changes? (are you a prescriber?)<br>Probe: guideline use<br>Probe: device type<br>Probe: regime – ie OD or BD?<br>Probe: technique?<br>Probe: aftercare/follow-up?<br>Probe: SABA use?                                                                                 |
| <b>Topic: Acceptability and feasibility of MART in the ED</b>                                                                                                                                                                                                                                                          |
| 1. How do you/would you feel about ED making a change to a patient's long-term management for a chronic condition when seeing them in the ED e.g. changing preventer inhalers?<br>Probe: capability?<br>Probe: knowledge/skills<br>Probe: appropriateness of timing?<br>Probe: accessing different groups of patients? |

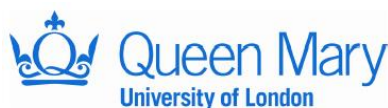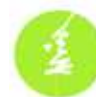

Asthma UK Centre  
for Applied Research

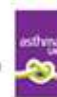

## 2. What are your thoughts on MART?

Probe: what is your experience of stopping the salbutamol inhaler and moving to a MART regime?

*Information for those who need it: MART is a single inhaler containing the combination of an inhaler corticosteroid and formoterol, a specific long-acting bronchodilator, for both maintenance and quick relief therapy – and is currently recommended by the Global Initiative for asthma in from step 1 in asthma management.*

*Fundamental to MART is that this inhaler provides quick relief of asthma symptoms, similar to salbutamol. This means many people may not need a separate blue/reliever inhaler if they were on the MART regime MART also reducing the risk for severe asthma exacerbations and at a lower ICS exposure.*

*Examples of MART inhalers are: the Symbicort turbohaler; fostair or duoresp spriromax.*

## 3. How would you feel about ED changing a patient to MART?

Probe: capability?

Probe: knowledge/skills

Probe: resources provided

Probe: linking primary care/ED

## 4. What might support you to prescribe MART in ED / support you if MART was prescribed in ED?

Probe: TDF domains

### Topic: Discharge from ED

## 1. What is your role when patients are discharged from the ED following their asthma presentation?

Probe: education, safety-netting, action plan, resources

## 2. What do you think is important to people when they are discharged from ED following an asthma exacerbation?

### Topic: Conclusion

## 1. Do you have anything further you would like to add?
