# Supplementary material
Source: HighWire-hosted journal article supplement (https://emj.bmj.com/content/emermed-2024-214407)
Supplement: inline-supplementary-material-3 [file inline-supplementary-material-3.pdf]

Table S1 Researchers characteristics

|                     | Characteristics                                                                                                                                                                                                                                                                                                                                                                                                                                                                                                                                                                                                                                                                                                                                                                                                                    |
|---------------------|------------------------------------------------------------------------------------------------------------------------------------------------------------------------------------------------------------------------------------------------------------------------------------------------------------------------------------------------------------------------------------------------------------------------------------------------------------------------------------------------------------------------------------------------------------------------------------------------------------------------------------------------------------------------------------------------------------------------------------------------------------------------------------------------------------------------------------|
| General description | In qualitative studies, the characteristics of the researcher, influence the research findings. Reflexivity is the term given to this circular relationship between cause and effect. In this study, Reflective inductive thematic analysis was chosen, recognising that the researcher’s position is a necessary, unavoidable and integral ingredient in the process. To make assumptions clear, the researcher’s characteristics, education and relationships with the participants are described                                                                                                                                                                                                                                                                                                                                |
| First author        | I am a female registered nurse working in London, UK. I have emergency nursing and clinical research delivery experience. I have undergone training in qualitative methods as part of my doctoral training. This study was conducted as part of a PhD to understand the beliefs and behaviours of adults presenting to the ED with asthma, with a view to developing guidance for a medication optimisation intervention, funded by AUKCAR, based at Queen Mary University of London. There were no other sources of funding for this study. Several of the participants were known to me on a professional basis.                                                                                                                                                                                                                 |
| Additional authors  | <p>Paul Pfeffer - read and coded transcripts and assisted in the data analysis (academic, PhD supervisor, Respiratory consultant, male)</p> <p>Liz Steed is health psychologist with expertise in behavioural science and intervention development. She read and coded transcripts and assisted in the data analysis (academic, PhD supervisor, health phycologist, female)</p> <p>Katy Pike - assisted with contributions to discussions on data analysis and writing (academic, PhD supervisor, paediatrics respiratory consultant, female)</p> <p>Chris Griffiths - assisted with contributions to discussions on data analysis and writing (academic, PhD supervisor, GP, male)</p> <p>Ben Bloom – assisted with contributions to discussions on data analysis and writing (academic, Emergency Medicine consultant, male)</p> |
